# Supplementary material
Source: PubMed Central journal article supplement (PMC4576668)
Supplement: supp_115.225664_jpet225664_suppl_data.pdf [file supp_115.225664_jpet225664_suppl_data.pdf]

**The prodrug 4-chlorokynurenine causes ketamine-like antidepressant, but not side effects, by NMDA/glycine<sub>B</sub>-site inhibition**

Panos Zanos, Sean C. Piantadosi, Hui-Qiu Wu, Heather J. Pribut, Matthew J. Dell, Adem Can, H. Ralph Snodgrass, Carlos A. Zarate Jr, Robert Schwarcz, Todd D. Gould

## SUPPLEMENTARY FIGURES/FIGURE LEGENDS

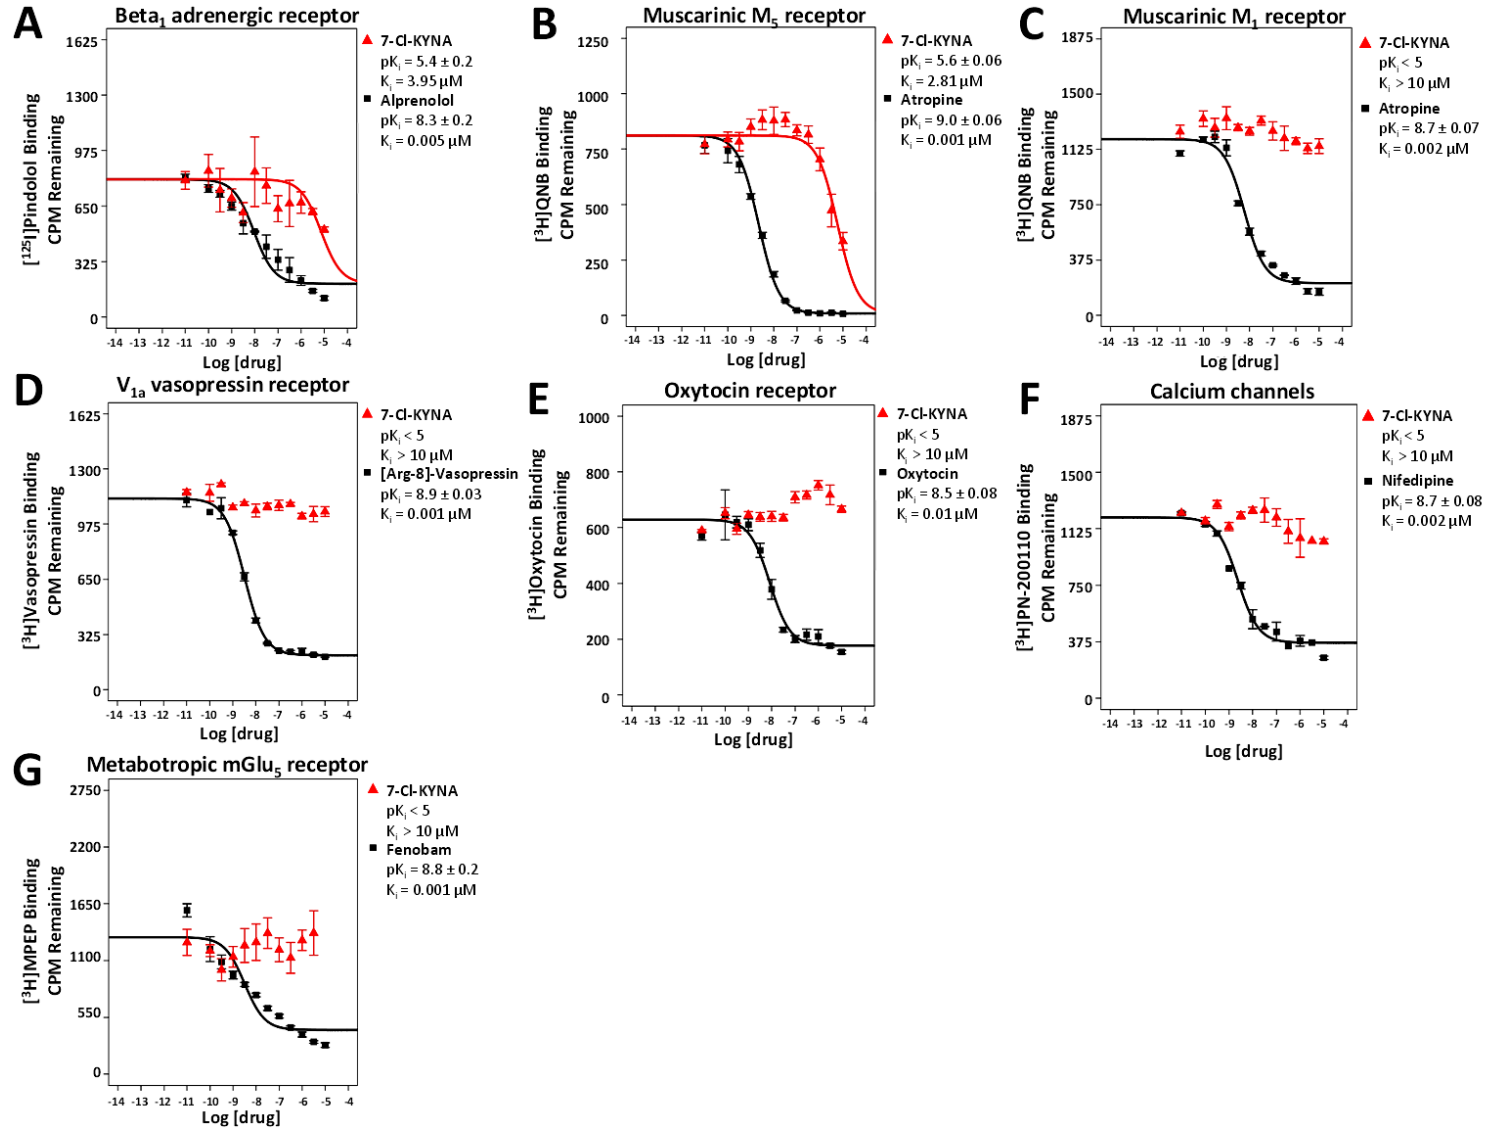

**Figure S1:  $K_i$  values for 7-Cl-KYNA against a panel of receptors.** Data represent  $K_i$  (μM) values obtained from non-linear regression of radioligand competition binding isotherms.  $K_i$  values are calculated from best fit IC<sub>50</sub> values using the Cheng-Prusoff equation. Data are the mean ± SEM (n=4/group in each experiment).

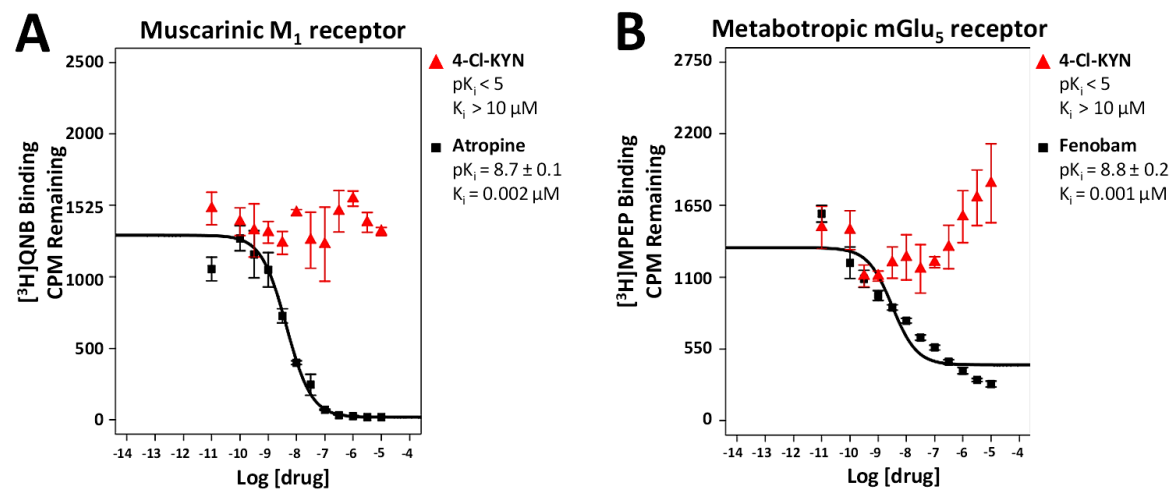

**Figure S2:  $K_i$  values for 4-Cl-KYN against a panel of receptors.** Data represent  $K_i$  ( $\mu\text{M}$ ) values obtained from non-linear regression of radioligand competition binding isotherms.  $K_i$  values are calculated from best fit  $\text{IC}_{50}$  values using the Cheng-Prusoff equation. Data are the mean  $\pm$  SEM (n=4/group in each experiment).

## SUPPLEMENTARY TABLES

Table S1: Potency at off-target G-protein coupled receptors, ion channels and transporters

| Target                | Receptor Family             | 7-chlorokynurenic acid              | 4-chlorokynurenine |
|-----------------------|-----------------------------|-------------------------------------|--------------------|
|                       |                             | K <sub>i</sub> (μM) or % Inhibition |                    |
| 5-HT <sub>1A</sub>    | Serotonergic                | 0 %                                 | 11 %               |
| 5-HT <sub>1B</sub>    |                             | 5 %                                 | 7 %                |
| 5-HT <sub>1D</sub>    |                             | 6 %                                 | 0 %                |
| 5-HT <sub>1F</sub>    |                             | 0 %                                 | 0 %                |
| 5-HT <sub>2A</sub>    |                             | 0 %                                 | 0 %                |
| 5-HT <sub>2B</sub>    |                             | 0 %                                 | 0 %                |
| 5-HT <sub>2C</sub>    |                             | 4 %                                 | 0 %                |
| 5-HT <sub>3</sub>     |                             | 5 %                                 | 12 %               |
| 5-HT <sub>5A</sub>    |                             | 0 %                                 | 0 %                |
| 5-HT <sub>6</sub>     |                             | 1 %                                 | 4 %                |
| 5-HT <sub>7</sub>     |                             | 13 %                                | 0 %                |
| Serotonin transporter |                             | 32 %                                | 5 %                |
| Alpha <sub>1A</sub>   |                             | Adrenergic                          | 2 %                |
| Alpha <sub>1B</sub>   | 38 %                        |                                     | 0 %                |
| Alpha <sub>1D</sub>   | 0 %                         |                                     | 1 %                |
| Alpha <sub>2A</sub>   | 0 %                         |                                     | 0 %                |
| Alpha <sub>2B</sub>   | 6 %                         |                                     | 0 %                |
| Alpha <sub>2C</sub>   | 0 %                         |                                     | 20 %               |
| Beta <sub>1</sub>     | <b>3.95 μM</b>              |                                     | 0 %                |
| Beta <sub>2</sub>     | 0 %                         |                                     | 0 %                |
| Beta <sub>3</sub>     | 0 %                         |                                     | 0 %                |
| AMPA                  | Glutamatergic               | ND                                  | 9 %                |
| mGlu <sub>5</sub> R   |                             | <b>&gt;10 μM</b>                    | <b>&gt;10 μM</b>   |
| Kainate               |                             | ND                                  | 0 %                |
| D1                    | Dopaminergic                | 0 %                                 | 11 %               |
| D2                    |                             | 0 %                                 | 0 %                |
| D3                    |                             | 0 %                                 | 4 %                |
| D4                    |                             | 8 %                                 | 2 %                |
| D5                    |                             | 3 %                                 | 0 %                |
| Dopamine transporter  | 9 %                         | 0 %                                 |                    |
| δ                     | Opioid                      | 1 %                                 | 0 %                |
| μ                     |                             | 10 %                                | 0 %                |
| κ                     |                             | 0 %                                 | 0 %                |
| GABA <sub>A</sub>     | GABAergic                   | 1 %                                 | 5 %                |
| H <sub>1</sub>        | Histaminergic               | 6 %                                 | 0 %                |
| H <sub>2</sub>        |                             | 0 %                                 | 0 %                |
| H <sub>3</sub>        |                             | 0 %                                 | 0 %                |
| H <sub>4</sub>        |                             | 0 %                                 | 3 %                |
| M <sub>1</sub>        | Muscarinic<br>Acetylcholine | <b>&gt;10 μM</b>                    | <b>&gt;10 μM</b>   |
| M <sub>2</sub>        |                             | 8 %                                 | 5 %                |
| M <sub>3</sub>        |                             | 0 %                                 | 1 %                |
| M <sub>4</sub>        |                             | 10 %                                | 0 %                |
| M <sub>5</sub>        |                             | <b>2.81 μM</b>                      | 7 %                |
| Norepinephrine        | Norepinephrinergic          | 0 %                                 | 0 %                |
| PBR                   | Peripheral                  | 2 %                                 | 0 %                |
| σ <sub>1</sub>        | Dimethyl-tryptamine         | 0 %                                 | 0 %                |
| σ <sub>2</sub>        | Unknown                     | 0 %                                 | 12 %               |
| Calcium Channels      |                             | <b>&gt;10 μM</b>                    | 0 %                |
| Oxytocin              | Oxytocinergic               | <b>&gt;10 μM</b>                    | 0 %                |
| V <sub>1A</sub>       | Vasopressinergic            | <b>&gt;10 μM</b>                    | 48 %               |

All experiments were binding assays performed by PDSP. %<sub>4</sub> values are the mean of 4 replicates and were derived from single concentration (10μM). Negative values are represented as 0% here. K<sub>i</sub> values (μM; in bold) were determined from full concentration curves only for receptors displaying >50% inhibition.

Table S2: Assay conditions for radioligand binding assays

| Receptor              | Radioligand (Assay Concentration)               | Reference compound | Binding Buffer                                                | pH  |
|-----------------------|-------------------------------------------------|--------------------|---------------------------------------------------------------|-----|
| 5-HT <sub>1A</sub>    | [ <sup>3</sup> H]8-OH-DPAT (0.5 nM)             | Methysergide       | 50 mM Tris HCl, 10 mM MgCl <sub>2</sub> , 0.1 mM EDTA         | 7.4 |
| 5-HT <sub>1B</sub>    | [ <sup>3</sup> H]GR127543 (0.3 nM)              | Ergotamine         | 50 mM Tris HCl, 10 mM MgCl <sub>2</sub> , 0.1 mM EDTA         | 7.4 |
| 5-HT <sub>1D</sub>    | [ <sup>3</sup> H]GR127543 (0.3 nM)              | Ergotamine         | 50 mM Tris HCl, 10 mM MgCl <sub>2</sub> , 0.1 mM EDTA         | 7.4 |
| 5-HT <sub>1E</sub>    | [ <sup>3</sup> H]5-HT (3 nM)                    | 5-HT               | 50 mM Tris HCl, 10 mM MgCl <sub>2</sub> , 0.1 mM EDTA         | 7.4 |
| 5-HT <sub>2A</sub>    | [ <sup>3</sup> H]Ketanserin (0.5 nM)            | Chlorpromazine     | 50 mM Tris HCl, 10 mM MgCl <sub>2</sub> , 0.1 mM EDTA         | 7.4 |
| 5-HT <sub>2B</sub>    | [ <sup>3</sup> H]LSD (1 nM)                     | Methysergide       | 50 mM Tris HCl, 10 mM MgCl <sub>2</sub> , 0.1 mM EDTA         | 7.4 |
| 5-HT <sub>2C</sub>    | [ <sup>3</sup> H]Mesulergine (0.5 nM)           | Chlorpromazine     | 50 mM Tris HCl, 10 mM MgCl <sub>2</sub> , 0.1 mM EDTA         | 7.4 |
| 5-HT <sub>3</sub>     | [ <sup>3</sup> H]LY278584 (0.3 nM)              | LY278584           | 50 mM Tris HCl, 10 mM MgCl <sub>2</sub> , 0.1 mM EDTA         | 7.4 |
| 5-HT <sub>5A</sub>    | [ <sup>3</sup> H]LSD (1 nM)                     | Ergotamine         | 50 mM Tris HCl, 10 mM MgCl <sub>2</sub> , 0.1 mM EDTA         | 7.4 |
| 5-HT <sub>6</sub>     | [ <sup>3</sup> H]LSD (1 nM)                     | Chlorpromazine     | 50 mM Tris HCl, 10 mM MgCl <sub>2</sub> , 0.1 mM EDTA         | 7.4 |
| 5-HT <sub>7</sub>     | [ <sup>3</sup> H]LSD (1 nM)                     | Chlorpromazine     | 50 mM Tris HCl, 10 mM MgCl <sub>2</sub> , 0.1 mM EDTA         | 7.4 |
| Serotonin transporter | [ <sup>3</sup> H]Citalopram (0.5 nM)            | Amitriptyline      | 50 mM Tris HCl, 150 mM NaCl, 5 mM KCl                         | 7.4 |
| Alpha <sub>1A</sub>   | [ <sup>3</sup> H]Prazosin (0.5 nM)              | Prazosin           | 20 mM Tris HCl, 145 mM NaCl                                   | 7.4 |
| Alpha <sub>1B</sub>   | [ <sup>3</sup> H]Prazosin (1.5 nM)              | Prazosin           | 20 mM Tris HCl, 145 mM NaCl                                   | 7.4 |
| Alpha <sub>1D</sub>   | [ <sup>3</sup> H]Prazosin (0.5 nM)              | Prazosin           | 20 mM Tris HCl, 145 mM NaCl                                   | 7.4 |
| Alpha <sub>2A</sub>   | [ <sup>3</sup> H]Clonidine (1 nM)               | Oxymetazoline      | 50 mM Tris HCl, 5 mM MgCl <sub>2</sub>                        | 7.7 |
| Alpha <sub>2B</sub>   | [ <sup>3</sup> H]Clonidine (1 nM)               | Prazosin           | 50 mM Tris HCl, 5 mM MgCl <sub>2</sub>                        | 7.7 |
| Alpha <sub>2C</sub>   | [ <sup>3</sup> H]Clonidine (1 nM)               | Prazosin           | 50 mM Tris HCl, 5 mM MgCl <sub>2</sub>                        | 7.7 |
| Beta <sub>1</sub>     | [ <sup>125</sup> I]Iodopindolol (0.1 nM)        | Atenolol           | 50 mM Tris HCl, 3 mM MnCl <sub>2</sub>                        | 7.7 |
| Beta <sub>2</sub>     | [ <sup>125</sup> I]Iodopindolol (0.1 nM)        | ICI118551          | 50 mM Tris HCl, 3 mM MnCl <sub>2</sub>                        | 7.7 |
| Beta <sub>3</sub>     | [ <sup>125</sup> I]Iodopindolol (0.1 nM)        | ICI118551          | 50 mM Tris HCl, 3 mM MnCl <sub>2</sub>                        | 7.7 |
| AMPA                  | [ <sup>3</sup> H]AMPA (1 nM)                    | Glutamic Acid      | 50 mM Tris HCl, 2.5 mM CaCl <sub>2</sub>                      | 7.4 |
| mGlu <sub>5</sub> R   | [ <sup>3</sup> H]MPEP (3.8 nM)                  | Fenobam            | 50 mM Tris HCl, 10 mM MgCl <sub>2</sub> , 0.1 mM EDTA         | 7.4 |
| Kainate               | [ <sup>3</sup> H]Kainic Acid (10.7 nM)          | Glutamic Acid      | 50 mM Tris HCl, 2.5 mM CaCl <sub>2</sub>                      | 7.4 |
| D <sub>1</sub>        | [ <sup>3</sup> H]SCH233930 (0.2 nM)             | SKF38393           | 50 mM HEPES, 50 mM NaCl, 5 mM MgCl <sub>2</sub> , 0.5 mM EDTA | 7.4 |
| D <sub>2</sub>        | [ <sup>3</sup> H]N-methylspiperone (0.2 nM)     | Haloperidol        | 50 mM HEPES, 50 mM NaCl, 5 mM MgCl <sub>2</sub> , 0.5 mM EDTA | 7.4 |
| D <sub>3</sub>        | [ <sup>3</sup> H]N-methylspiperone (0.2 nM)     | Chlorpromazine     | 50 mM HEPES, 50 mM NaCl, 5 mM MgCl <sub>2</sub> , 0.5 mM EDTA | 7.4 |
| D <sub>4</sub>        | [ <sup>3</sup> H]N-methylspiperone (0.3 nM)     | Chlorpromazine     | 50 mM HEPES, 50 mM NaCl, 5 mM MgCl <sub>2</sub> , 0.5 mM EDTA | 7.4 |
| D <sub>5</sub>        | [ <sup>3</sup> H]SCH233930 (0.2 nM)             | SKF38393           | 50 mM HEPES, 50 mM NaCl, 5 mM MgCl <sub>2</sub> , 0.5 mM EDTA | 7.4 |
| Dopamine transporter  | [ <sup>3</sup> H]WIN35428 (0.5 nM)              | GBR12909           | 50 mM Tris HCl, 150 mM NaCl, 5 mM KCl                         | 7.4 |
| δ                     | [ <sup>3</sup> H]DADLE (0.3 nM)                 | Naltrindole        | 50 mM Tris HCl, 10 mM MgCl <sub>2</sub> , 0.1 mM EDTA         | 7.4 |
| μ                     | [ <sup>3</sup> H]U69593 (0.3 nM)                | Salvinorin A       | 50 mM Tris HCl, 10 mM MgCl <sub>2</sub> , 0.1 mM EDTA         | 7.4 |
| κ                     | [ <sup>3</sup> H]DAMGO (0.3 nM)                 | DAMGO              | 50 mM Tris HCl, 10 mM MgCl <sub>2</sub> , 0.1 mM EDTA         | 7.4 |
| GABA <sub>A</sub>     | [ <sup>3</sup> H]Muscimol (1 nM)                | GABA               | 50 mM Tris Acetate                                            | 7.4 |
| H <sub>1</sub>        | [ <sup>3</sup> H]Pyrilamine (0.9 nM)            | Chlorpheniramine   | 50 mM Tris HCl, 0.5 mM EDTA                                   | 7.4 |
| H <sub>2</sub>        | [ <sup>3</sup> H]Tiotidine (3 nM)               | Cimetidine         | 50 mM Tris HCl, 0.5 mM EDTA                                   | 7.4 |
| H <sub>3</sub>        | [ <sup>3</sup> H]alpha-methylhistamine (0.4 nM) | Histamine          | 50 mM Tris HCl, 0.5 mM EDTA                                   | 7.4 |
| H <sub>4</sub>        | [ <sup>3</sup> H]Histamine (5 nM)               | Clozapine          | 50 mM Tris HCl, 0.5 mM EDTA                                   | 7.4 |
| M <sub>1</sub>        | [ <sup>3</sup> H]QNB (0.5 nM)                   | Atropine           | 50 mM Tris HCl                                                | 7.7 |
| M <sub>2</sub>        | [ <sup>3</sup> H]QNB (0.5 nM)                   | Atropine           | 50 mM Tris HCl                                                | 7.7 |

|                            |                                        |             |                                                                                          |     |
|----------------------------|----------------------------------------|-------------|------------------------------------------------------------------------------------------|-----|
| M <sub>3</sub>             | [ <sup>3</sup> H]QNB (0.5 nM)          | Atropine    | 50 mM Tris HCl                                                                           | 7.7 |
| M <sub>4</sub>             | [ <sup>3</sup> H]QNB (0.5 nM)          | Atropine    | 50 mM Tris HCl                                                                           | 7.7 |
| M <sub>5</sub>             | [ <sup>3</sup> H]QNB (0.5 nM)          | Atropine    | 50 mM Tris HCl                                                                           | 7.7 |
| Norepinerphine transporter | [ <sup>3</sup> H]Nisoxetine (0.5 nM)   | Desipramine | 50 mM Tris HCl, 150 mM NaCl, 5 mM KCl                                                    | 7.4 |
| PBR                        | [ <sup>3</sup> H]PK11195 (1 nM)        | PK11195     | 50 mM Tris HCl                                                                           | 7.4 |
| σ <sub>1</sub>             | [ <sup>3</sup> H]Pentazocine (3 nM)    | Haloperidol | 50 mM Tris HCl                                                                           | 8.0 |
| σ <sub>2</sub>             | [ <sup>3</sup> H]DTG (3 nM)            | Haloperidol | 50 mM Tris HCl                                                                           | 8.0 |
| Calcium Channels           | [ <sup>3</sup> H]Nitrendipine (0.1 nM) | Nifendipine | 50 mM Tris HCl, 50 mM NaCl, 1 mM CaCl <sub>2</sub>                                       | 7.4 |
| Oxytocin                   | [ <sup>3</sup> H]Oxytocin              | Oxytocin    | 50 mM HEPES, 10 mM MnCl <sub>2</sub>                                                     | 7.4 |
| V <sub>1A</sub>            | [ <sup>3</sup> H]Vasopressin (1 nM)    | Vasopressin | 20 mM Tris HCl, 100 mM NaCl, 10 mM MgCl <sub>2</sub> , 0.1 mg/ml bacitracin, 1 mg/ml BSA | 7.4 |
